# Supplementary material for: Excellent Fireproof Characteristics and High Thermal Stability of Rice Husk-Filled Polyurethane with Halogen-Free Flame Retardant
Source: MDPI journal article supplement (doi:10.3390/polym11101587), 2019-09-28
Supplement: s1 [file s1]

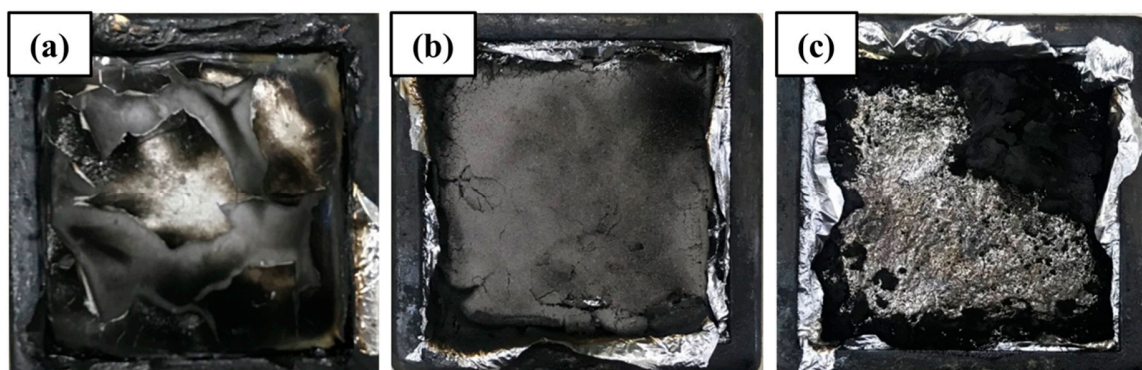

**Figure S1.** The digital photos of the residual char after cone calorimetry test of (a) PU–RH, (b) PU–RH/ATH, and (c) PU–RH/OP.

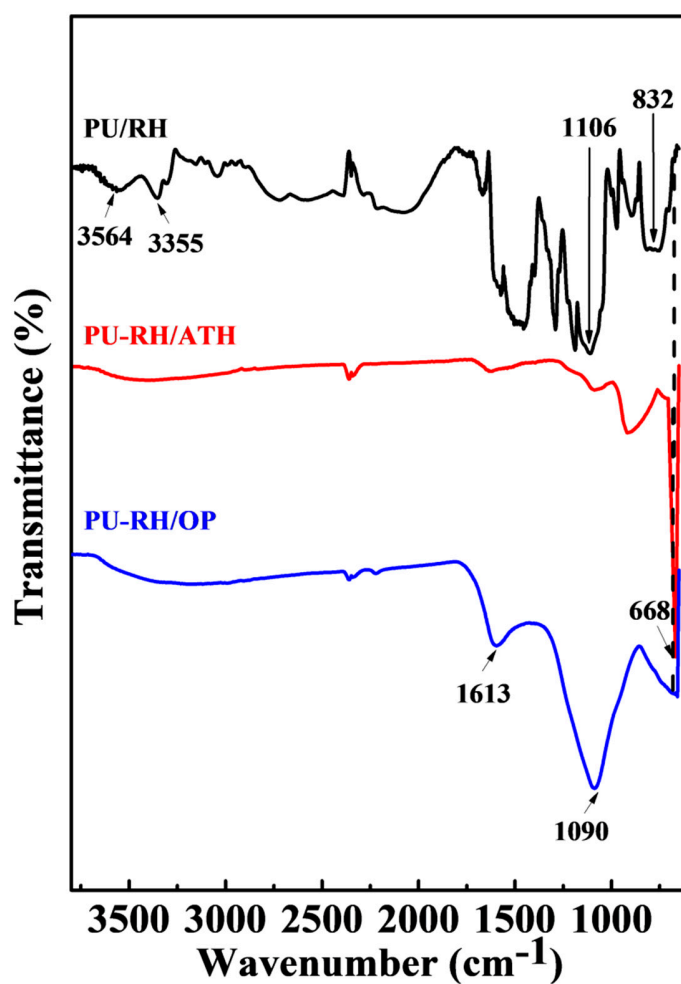

**Figure S2.** FTIR spectra of PU–RH and PU–RH/FR residues after cone calorimetry test.

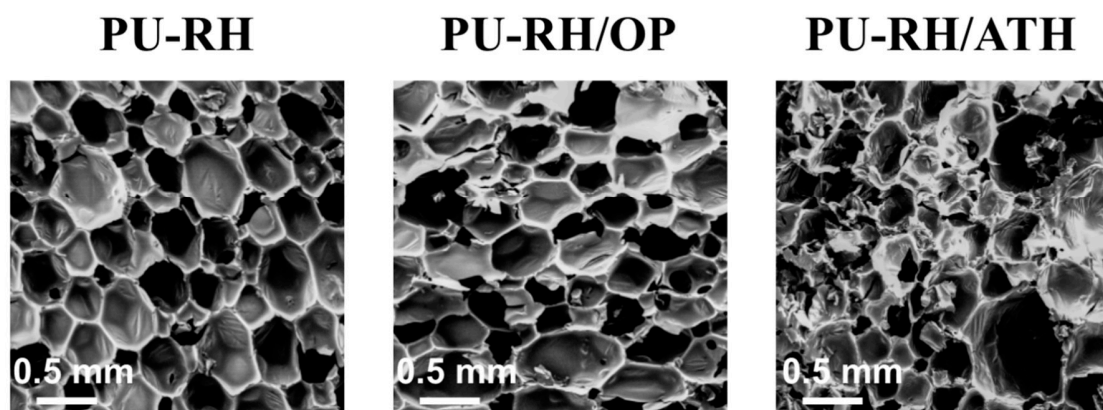

**Figure S3.** SEM micrographs of PU-RH and PU-RH/FR residues after cone calorimetry test.
